# Supplementary material for: Pharmaceutical and Antibiotic Pollutant Levels in Wastewater and the Waters of the Zarqa River, Jordan
Source: MDPI journal article supplement (doi:10.3390/app11188638), 2021-09-17
Supplement: s1 [file s1]

## Supporting Information

Table S1. Geographic positioning system (GPS) coordinates of the sampling sites for wastewater treatment plant (WWTP) influent and effluent and Zarqa River (ZR) water. Data from Shigei et al. (2020)

| No. | Sampling site              | North         | East          |
|-----|----------------------------|---------------|---------------|
| 1   | Assamra WWTP influent      | 32° 08.875'N  | 36° 10.139' E |
| 2   | Assamra WWTP effluent      | 32° 08.728'N  | 36° 10.345'E  |
| 3   | ZR-Sukhna station          | 32° 06.902'N  | 36° 03.487'E  |
| 4   | ZR, Twahin Eledwan station | 32° 12.240'N  | 35° 59.245'E  |
| 5   | ZR, Military station       | 32° 12.923' N | 35° 53.44' E  |
| 6   | Jerash stream              | 32° 12.898'N  | 35° 53.287'E  |

Table S2. List of pharmaceutically active compounds (PhACs, including antibiotics) targeted in analysis of liquid samples and their chemical and physical properties (chemical formula, molecular weight (MW), logarithmic octanol-water distribution coefficient (log  $K_{ow}$ ), organic carbon-water partition coefficient ( $K_{oc}$ ), logarithmic dissociation constant (pKa), and water solubility at 25 °C(mg/L). Values without any reference superscript (+) were modeled and taken from ChemSpider (2020)

| Compounds                                                           | Formula                                                                       | MW     | Log $K_{ow}$       | $K_{oc}$ | pKa <sup>++</sup> | Water solubility <sup>+</sup> |
|---------------------------------------------------------------------|-------------------------------------------------------------------------------|--------|--------------------|----------|-------------------|-------------------------------|
| Anti-epileptic and serotonin suppressive re-uptake inhibitory PhACs |                                                                               |        |                    |          |                   |                               |
| Carbamazepine                                                       | C <sub>15</sub> H <sub>12</sub> N <sub>2</sub> O                              | 236.30 | 2.45               | 3871     | 13.9              | 17.66                         |
| Citalopram                                                          | C <sub>20</sub> H <sub>21</sub> FN <sub>2</sub> O                             | 324.39 | 3.74 <sup>+</sup>  | 25370    | 9.78              | 31.09                         |
| Fluoxetine                                                          | C <sub>17</sub> H <sub>18</sub> F <sub>3</sub> NO                             | 309.33 | 4.05               | 2.07E+05 | 9.8               | 38.35                         |
| Oxazepam                                                            | C <sub>15</sub> H <sub>11</sub> ClN <sub>2</sub> O <sub>2</sub>               | 286.71 | 3.34               | 1207     | 1.55, 10.9        | 20.71                         |
| Sertraline                                                          | C <sub>17</sub> H <sub>17</sub> Cl <sub>2</sub> N                             | 306.23 | 5.29 <sup>+</sup>  | 3.42E+05 | 9.16              | 3.517                         |
| Risperidone                                                         | C <sub>23</sub> H <sub>27</sub> FN <sub>4</sub> O <sub>2</sub>                | 410.5  | 3.49 <sup>+</sup>  | 4.42E+06 | 8.76              | 2.763                         |
| Stimulant                                                           |                                                                               |        |                    |          |                   |                               |
| Caffeine                                                            | C <sub>8</sub> H <sub>10</sub> N <sub>4</sub> O <sub>2</sub>                  | 194.19 | -0.07              | 10       | 14                | 2632                          |
| Anti-fungal                                                         |                                                                               |        |                    |          |                   |                               |
| Ketoconazole                                                        | C <sub>26</sub> H <sub>28</sub> Cl <sub>2</sub> N <sub>4</sub> O <sub>4</sub> | 531.43 | 4.34               | 3000     | 4.6               | 0.29 <sup>++++</sup>          |
| Antidiabetic                                                        |                                                                               |        |                    |          |                   |                               |
| Metformin                                                           | C <sub>4</sub> H <sub>11</sub> N <sub>5</sub>                                 | 129.16 | -1.40 <sup>+</sup> | 140.9    | 12.4              | 1.00 × 10 <sup>6</sup>        |
| Beta-blockers                                                       |                                                                               |        |                    |          |                   |                               |
| Atenolol                                                            | C <sub>14</sub> H <sub>22</sub> N <sub>2</sub> O <sub>3</sub>                 | 266.34 | 0.16               | 148.1    | 9.6               | 685.2                         |
| Amlodipine                                                          | C <sub>20</sub> H <sub>25</sub> ClN <sub>2</sub> O <sub>5</sub>               | 408.90 | 3.00               | 3334     | 9.4               | 75.32                         |
| Metoprolol                                                          | C <sub>15</sub> H <sub>25</sub> NO <sub>3</sub>                               | 267.36 | 1.88               | 62.24    | 9.7               | 4777                          |
| Bisoprolol                                                          | C <sub>18</sub> H <sub>31</sub> NO <sub>4</sub>                               | 311.40 | 1.87               | 32.85    | 9.5               | 2240                          |
| Propranolol                                                         | C <sub>16</sub> H <sub>21</sub> NO <sub>2</sub>                               | 259.34 | 3.48               | 1218     | 9.42              | 228                           |
| Anti-inflammatory                                                   |                                                                               |        |                    |          |                   |                               |
| Paracetamol                                                         | C <sub>8</sub> H <sub>9</sub> NO <sub>2</sub>                                 | 151.16 | 0.46               | 61.72    | -4.4              | 3.04 × 10 <sup>4</sup>        |
| Antibiotics                                                         |                                                                               |        |                    |          |                   |                               |
| Ciprofloxacin                                                       | C <sub>17</sub> H <sub>18</sub> FN <sub>3</sub> O <sub>3</sub>                | 331.34 | 0.28               | 35.51    | 6.09              | 1.148 × 10 <sup>4</sup>       |
| Clarithromycin                                                      | C <sub>38</sub> H <sub>69</sub> NO <sub>13</sub>                              | 747.95 | 3.16               | 150      | 8.99              | 1.693                         |
| Clindamycin                                                         | C <sub>18</sub> H <sub>33</sub> ClN <sub>2</sub> O <sub>5</sub> S             | 424.98 | 2.16               | 58.59    | 7.79              | 30.61                         |
| Doxycycline                                                         | C <sub>22</sub> H <sub>24</sub> N <sub>2</sub> O <sub>8</sub>                 | 444.44 | -0.02              | 64.63    | 3.09              | 312.9                         |

|                             |                                                                 |        |                    |       |            |                         |
|-----------------------------|-----------------------------------------------------------------|--------|--------------------|-------|------------|-------------------------|
| Erythromycin                | C <sub>37</sub> H <sub>67</sub> NO <sub>13</sub>                | 733.93 | 3.06               | 570   | 8.88       | 4.2                     |
| Ofloxacin                   | C <sub>18</sub> H <sub>20</sub> FN <sub>3</sub> O <sub>4</sub>  | 361.37 | -2.00 <sup>+</sup> | 44.44 | 5.97, 9.28 | 6.762 × 10 <sup>5</sup> |
| Linezolid                   | C <sub>16</sub> H <sub>20</sub> FN <sub>3</sub> O <sub>4</sub>  | 337.35 | 1.26 <sup>+</sup>  | 243.3 | 1.8        | 613.5                   |
| Metronidazole               | C <sub>6</sub> H <sub>9</sub> N <sub>3</sub> O <sub>3</sub>     | 171.15 | -0.02              | 10    | 2.38       | 2.573 × 10 <sup>4</sup> |
| Moxifloxacin                | C <sub>21</sub> H <sub>24</sub> FN <sub>3</sub> O <sub>4</sub>  | 401.43 | 0.95 <sup>+</sup>  | 158.6 | 5.69, 9.42 | 1146                    |
| Norfloxacin                 | C <sub>16</sub> H <sub>18</sub> FN <sub>3</sub> O <sub>3</sub>  | 319.33 | -1.03              | 92.05 | 6.34, 8.75 | 1.779 × 10 <sup>5</sup> |
| Tetracycline                | C <sub>22</sub> H <sub>24</sub> N <sub>2</sub> O <sub>8</sub>   | 444.44 | -1.30              | 57.59 | 3.3        | 3877                    |
| Trimethoprim                | C <sub>14</sub> H <sub>18</sub> N <sub>4</sub> O <sub>3</sub>   | 290.32 | 0.91               | 905   | 7.12       | 2334                    |
| Amoxicillin                 | C <sub>16</sub> H <sub>19</sub> N <sub>3</sub> O <sub>5</sub> S | 365.40 | 0.87               | 865.5 | 3.2, 11.7  | 3433                    |
| Ampicillin                  | C <sub>16</sub> H <sub>19</sub> N <sub>3</sub> O <sub>4</sub> S | 349.41 | 1.35               | 534.4 | 2.5, 7.3   | 439.3                   |
| Benzylpenicillin            | C <sub>16</sub> H <sub>18</sub> N <sub>2</sub> O <sub>4</sub> S | 334.39 | 1.83               | 421.4 | 2.74       | 210.4                   |
| Fusidic acid <sup>+++</sup> | C <sub>31</sub> H <sub>48</sub> O <sub>6</sub>                  | 516.71 | 6.75 <sup>+</sup>  | –     | 5.35       | 0.002376                |
| Rifampicin                  | C <sub>43</sub> H <sub>58</sub> N <sub>4</sub> O <sub>12</sub>  | 822.41 | 4.24 <sup>+</sup>  | –     | 1.7, 7.9   | 1400                    |
| Sulfamethoxazole            | C <sub>10</sub> H <sub>11</sub> N <sub>3</sub> O <sub>3</sub> S | 253.28 | 0.89               | 1531  | 1.6, 5.7   | 3942                    |

<sup>+</sup> Data estimated by EPI and obtained from [www.Chemspider.com](http://www.Chemspider.com), access date 6 April 2020.

<sup>++</sup>Data obtained from ????, access date 6 April 2020.

<sup>+++</sup> Data obtained from [echa.europa.eu](http://echa.europa.eu), access date 6 April 2020.

<sup>++++</sup>Data obtained from [pubchem.ncbi.nlm.nih.gov/](http://pubchem.ncbi.nlm.nih.gov/), water solubility at 20°C, access date 6 April 2020.

– Data not available

Table S3. Concentrations of total suspended solids (TSS), total solids (TS) and chemical oxygen demand (COD) samples (n=1 per site) in Assamra wastewater treatment plant (WWTP) influent and effluent and Zarqa River (ZR) water at Sukhna station, Twahin Eledwan station, Military station, and Jerash stream. Data from Shigei et al. (2020)

|                           | Assamra<br>WWTP<br>influent | Assamra<br>WWTP<br>effluent | ZR-<br>Sukhna<br>Station | ZR-<br>Twahin<br>Eldewan<br>station | ZR-<br>Military<br>station | Jerash<br>stream |
|---------------------------|-----------------------------|-----------------------------|--------------------------|-------------------------------------|----------------------------|------------------|
| pH (SU)                   | 7.26                        | 7.72                        | 8.32                     | 7.96                                | 8.52                       | 7.86             |
| TSS (mg L <sup>-1</sup> ) | 520                         | 10                          | 40                       | <2                                  | 40                         | 14               |
| TS (mg L <sup>-1</sup> )  | 1550                        | 1000                        | 1400                     | 840                                 | 1250                       | 4600             |
| COD (mg L <sup>-1</sup> ) | 950                         | 40                          | 110                      | 10                                  | 30                         | 4.0              |

Table S4. Concentrations of pharmaceutically active compounds (PhACs, excluding antibiotics) in samples of Assamra wastewater treatment plant (WWTP) influent and effluent, and in Zarqa River (ZR) water at Sukhna station, Twahin Eledwan station, Military station, and Jerash stream

| PhACs         | Assamra WWTP influent |       | Assamra WWTP effluent |      | ZR-Sukhna station |       | ZR-Twahin Eledwan station |      | ZR- Military station |      | Jerash stream |     |
|---------------|-----------------------|-------|-----------------------|------|-------------------|-------|---------------------------|------|----------------------|------|---------------|-----|
|               | S1                    | S2    | S1                    | S2   | S1                | S2    | S1                        | S2   | S1                   | S2   | S1            | S2  |
| Atenolol      | 1952                  | 1723  | 110                   | 81   | 519               | 572   | 6.5                       | 14   | 25.0                 | 69   | 1.1           | 1.2 |
| Amlodipine    | 11                    | 5.8   | 6.4                   | 2.2  | 2.7               | 2.8   | <1                        | <1   | 1.0                  | 3.5  | <1            | <1  |
| Bisprolol     | 35                    | 16    | 217                   | 222  | 8.7               | 8.3   | 15                        | 28   | 49                   | 86   | <1            | <1  |
| Carbamazepine | 3020                  | 2365  | 3352                  | 3138 | 1940              | 1637  | 799                       | 798  | 1414                 | 2695 | 1.4           | 1.3 |
| Citalopram    | 4.3                   | 2.5   | 44                    | 41   | 2.1               | 3.5   | 5.9                       | 8.5  | 8.9                  | 15.3 | <1            | <1  |
| Diazinon      | 1.3                   | 1.3   | 3.5                   | 3.9  | ND                | 1.0   | <1                        | <1   | 1.1                  | 2.5  | ND            | ND  |
| Fluoxetine    | 1.5                   | <1    | 2.8                   | 2.9  | <1                | <1    | <1                        | <1   | <1                   | <1   | <1            | <1  |
| Ketoconazole  | 298                   | 187   | 39                    | 37   | 7.6               | 4.7   | 1.9                       | 2.3  | 2.4                  | 3.1  | <1            | <1  |
| Metformin     | 1398                  | 851   | 31                    | 21   | 83                | 85    | 2.3                       | 13   | 10                   | 18   | <1            | <1  |
| Metoprolol    | 18                    | 496   | 438                   | 406  | 658               | 7.8   | 35                        | 49   | 97                   | 170  | <1            | <1  |
| Oxazepam      | 427                   | 125   | 6.1                   | ND   | 47                | 38    | 48                        | 50   | ND                   | ND   | ND            | ND  |
| Paracetamol   | 24309                 | 14891 | 68                    | 7.9  | 4871              | 5916  | 45                        | 58   | 39                   | 71   | ND            | ND  |
| propranolol   | <1                    | 1.0   | 60                    | 55   | <1                | <1    | 10                        | 10   | 11                   | 20   | <1            | <1  |
| Risperidone   | 1.3                   | 1.1   | <1                    | <1   | <1                | <1    | <1                        | <1   | <1                   | <1   | <1            | <1  |
| Sertraline    | 5.7                   | 3.0   | 15                    | 16   | 1.1               | 1.5   | 1.8                       | 1.9  | <1                   | 1.1  | <1            | <1  |
| ΣPhACs        | 31485                 | 20668 | 4394                  | 4032 | 8141              | 8278  | 970                       | 1033 | 1657                 | 3154 | 2.5           | 2.5 |
| Caffeine      | 53223                 | 27737 | 273                   | 64   | 25646             | 20916 | 822                       | 755  | 694                  | 1287 | 16            | 18  |

Table S5. Concentrations of antibiotics in samples of Assamra wastewater treatment plant (WWTP) influent and effluent, and in Zarqa River (ZR) water at Sukhna station, Twahin Eledwan station, Military station, and Jerash stream

|                         | Assamra WWTP<br>influent |            | Assamra WWTP<br>effluent |             | ZR-Sukhna<br>station |            | ZR-Twahin Eledwan<br>station |            | ZR- Military<br>station |            | Jerash<br>stream |              |
|-------------------------|--------------------------|------------|--------------------------|-------------|----------------------|------------|------------------------------|------------|-------------------------|------------|------------------|--------------|
|                         | S1                       | S2         | S1                       | S2          | S1                   | S2         | S1                           | S2         | S1                      | S2         | S1               | S2           |
| <b>Fluoroquinolones</b> |                          |            |                          |             |                      |            |                              |            |                         |            |                  |              |
| Ciprofloxacin           | ND                       | ND         | 51                       | 44          | ND                   | ND         | 3.7                          | 2.5        | 3.1                     | 5.3        | ND               | ND           |
| Moxifloxacin            | ND                       | ND         | ND                       | ND          | ND                   | ND         | ND                           | ND         | ND                      | ND         | ND               | ND           |
| Norfloxacin             | ND                       | ND         | ND                       | ND          | ND                   | ND         | ND                           | ND         | ND                      | ND         | ND               | ND           |
| Ofloxacin               | 326                      | 116        | 1696                     | 1982        | 34                   | 7.0        | 234                          | 119        | 334                     | 595        | ND               | ND           |
| <b>Macrolides</b>       |                          |            |                          |             |                      |            |                              |            |                         |            |                  |              |
| Clarithromycin          | 370                      | 247        | 64                       | 100         | 82                   | 91         | 14                           | 10         | 12                      | 23         | ND               | ND           |
| Clindamycin             | ND                       | ND         | ND                       | ND          | ND                   | ND         | ND                           | ND         | ND                      | ND         | ND               | ND           |
| Erythromycin            | 81                       | 57         | 291                      | 339         | 30                   | 35         | 48                           | 42         | 64                      | 129        | ND               | ND           |
| <b>Lincomycin</b>       |                          |            |                          |             |                      |            |                              |            |                         |            |                  |              |
| Linezolid               | ND                       | ND         | ND                       | ND          | ND                   | ND         | ND                           | ND         | ND                      | ND         | ND               | ND           |
| <b>Antiprotozoal</b>    |                          |            |                          |             |                      |            |                              |            |                         |            |                  |              |
| Metronidazole           | 74                       | 86         | 172                      | 96          | 22                   | 11         | 17                           | 10         | 25                      | 47         | ND               | ND           |
| <b>Tetracyclines</b>    |                          |            |                          |             |                      |            |                              |            |                         |            |                  |              |
| Doxycycline             | ND                       | ND         | ND                       | ND          | ND                   | ND         | ND                           | ND         | ND                      | ND         | ND               | ND           |
| <b>Tetracycline</b>     | <b>ND</b>                | <b>ND</b>  | <b>ND</b>                | <b>ND</b>   | <b>ND</b>            | <b>ND</b>  | <b>ND</b>                    | <b>ND</b>  | <b>ND</b>               | <b>ND</b>  | <b>ND</b>        | <b>ND</b>    |
| <b>Sulfonamides</b>     |                          |            |                          |             |                      |            |                              |            |                         |            |                  |              |
| Trimetoprim             | ND                       | ND         | ND                       | ND          | ND                   | ND         | ND                           | ND         | ND                      | ND         | ND               | ND           |
| <b>Penicilin</b>        |                          |            |                          |             |                      |            |                              |            |                         |            |                  |              |
| Amoxicilin              | ND                       | -          | ND                       | ND          | ND                   | ND         | -                            | ND         | ND                      | ND         | ND               | ND           |
| Ampicillin              | ND                       | -          | ND                       | ND          | ND                   | ND         | -                            | ND         | ND                      | ND         | ND               | ND           |
| Benzylpenicillin        | ND                       | -          | ND                       | ND          | ND                   | ND         | -                            | ND         | ND                      | ND         | ND               | ND           |
| <b>Others</b>           |                          |            |                          |             |                      |            |                              |            |                         |            |                  |              |
| Fusidic acid            | ND                       | -          | ND                       | ND          | ND                   | ND         | -                            | ND         | ND                      | ND         | ND               | ND           |
| Rifampicin              | ND                       | -          | ND                       | ND          | ND                   | ND         | -                            | ND         | ND                      | ND         | ND               | ND           |
| Sulfamethoxazole        | 11                       | -          | 24                       | 20          | -                    | -          | -                            | <1         | 15                      | 20         | 12.5             | <1           |
| <b>∑Antibiotics</b>     | <b>860</b>               | <b>510</b> | <b>2300</b>              | <b>2600</b> | <b>170</b>           | <b>140</b> | <b>320</b>                   | <b>190</b> | <b>450</b>              | <b>820</b> | <b>12.5</b>      | <b>&lt;1</b> |

ND = Not detected.

(-) = could not be measured.
